# Supplementary material for: Redox Genetic Risk Score and the Incidence of End-Stage Kidney Disease in People with Type 1 Diabetes
Source: MDPI journal article supplement (doi:10.3390/cells11244131), 2022-12-19
Supplement: s1 [file s1]

**Redox Genetic Risk Score and the Incidence of End-Stage Kidney Disease  
in People with Type 1 Diabetes**

Kamel Mohammedi, Michel Marre, Samy Hadjadj, Louis Potier, Gilberto Velho

**SUPPLEMENTARY MATERIALS**

**Supplemental Figure S1.** Study flow-chart

**Supplemental Figure S2.** Hazard ratios for ESKD by redox genetic risk score

**Supplemental Table S1.** Minor allele frequencies of identified polymorphisms included in the GRS in the whole cohorts and in participants included or excluded from the present study

**Supplemental Table S2.** Characteristics of participants at baseline according to the incidence of ESKD during follow-up

**List of Contributors to SURGENE, GENEDIAB, and GENESIS studies**

**Supplemental Figure S1. Study flow-chart**

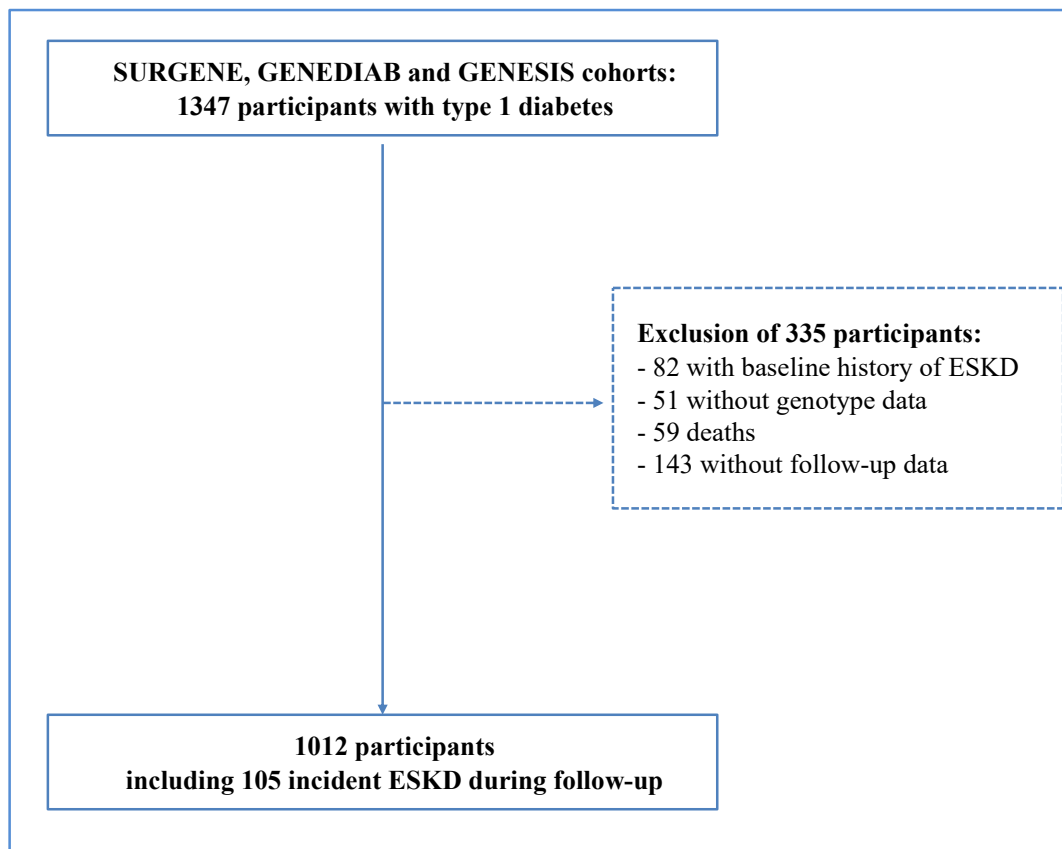

### Supplemental Figure S2. Hazard ratios for ESKD by redox genetic risk score

Multi-adjusted hazard ratios (blue solid line) and 95% confidence intervals (red dotted lines) for end-stage kidney disease (ESKD) during follow-up according to redox genetic risk score as a continuous variable with a reference value at 4 (diamond).

Analyses were adjusted for cohort membership, sex, age, duration of diabetes, systolic blood pressure, HbA1c, eGFR, urinary albumin concentration, diabetic retinopathy stages (absent, non-proliferative, proliferative), use of ACE inhibitors or ARBs drugs and tobacco smoking at baseline.

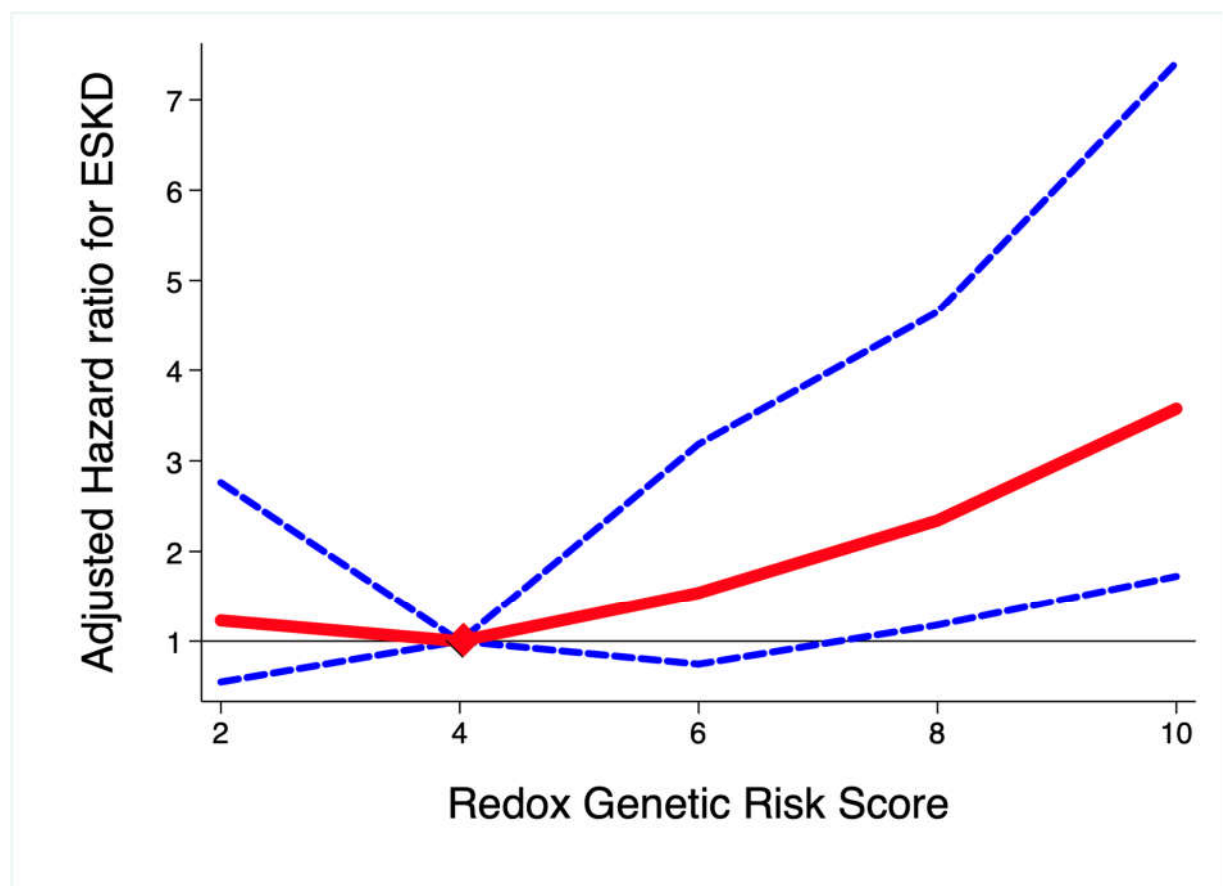

**Supplemental Table S1. Minor allele frequencies of identified polymorphisms included in the GRS in the whole cohorts and in participants included or excluded from the present study**

|              |             | Minor allele frequencies |                                  |                                   |
|--------------|-------------|--------------------------|----------------------------------|-----------------------------------|
|              |             | All<br>(N=1347)          | Excluded participants<br>(N=335) | Included participants<br>(N=1012) |
| <b>Genes</b> | <b>SNPs</b> |                          |                                  |                                   |
| <i>CAT</i>   | rs2420388   | 0.240                    | 0.260                            | 0.240                             |
| <i>GPX1</i>  | rs9818758   | 0.180                    | 0.180                            | 0.180                             |
| <i>GPX4</i>  | rs713041    | 0.470                    | 0.490                            | 0.460                             |
| <i>SOD2</i>  | rs4880      | 0.470                    | 0.470                            | 0.470                             |
| <i>SOD3</i>  | rs2270224   | 0.500                    | 0.500                            | 0.500                             |
| <i>CYBA</i>  | rs11076692  | 0.510                    | 0.500                            | 0.510                             |

**Supplemental Table S2. Characteristics of participants at baseline according to the incidence of ESKD during follow-up**

|                                         | ESKD during follow-up |                  | p       |
|-----------------------------------------|-----------------------|------------------|---------|
|                                         | No, n (%)             | Yes, n (%)       |         |
| N (%)                                   | 907 (89.6)            | 105 (10.4)       |         |
| Cohort membership, n (%)                |                       |                  | <0.0001 |
| SURGENE                                 | 310 (34.2)            | 17 (16.2)        |         |
| GENEDIAB                                | 225 (24.8)            | 48 (45.7)        |         |
| GENESIS                                 | 372 (41.0)            | 40 (38.1)        |         |
| Sex (women), n (%)                      | 402 (44.3)            | 51 (48.6)        | 0.69    |
| Age, years                              | 39.8 ± 13.0           | 40.0 ± 11.1      | 0.89    |
| Duration of diabetes, years             | 22.7 ± 11.6           | 24.9 ± 9.4       | 0.06    |
| Body mass index, kg/m <sup>2</sup>      | 24 ± 3                | 24 ± 4           | 0.53    |
| Systolic blood pressure, mmHg           | 129 ± 17              | 148 ± 20         | <0.0001 |
| Diastolic blood pressure, mmHg          | 75 ± 10               | 85 ± 12          | <0.0001 |
| HbA1c, %                                | 8.8 ± 1.8             | 9.3 ± 2.1        | 0.007   |
| HbA1c, mmol/mol                         | 72 ± 20               | 78 ± 23          |         |
| eGFR, ml/min/1.73m <sup>2</sup>         | 94 ± 24               | 54 ± 32          | <0.0001 |
| Categories of eGFR, n (%)               |                       |                  | <0.0001 |
| ≥ 60 ml/min/1.73 m <sup>2</sup>         | 834 (91.9)            | 37 (35.2)        |         |
| < 60 ml/min/1.73 m <sup>2</sup>         | 73 (8.1)              | 68 (64.8)        |         |
| UAC, mg/l                               | 10 (5, 38)            | 1033 (281, 2090) | <0.0001 |
| Categories of UAC, n (%)                |                       |                  | <0.0001 |
| Normoalbuminuria (<30 mg/l)             | 642 (70.8)            | 9 (8.6)          |         |
| Microalbuminuria (30 – <300 mg/l)       | 179 (19.7)            | 18 (17.1)        |         |
| Macroalbuminuria (≥300 mg/l)            | 86 (9.5)              | 78 (74.3)        |         |
| Use of ACE inhibitors or ARBs, n (%)    | 252 (27.9)            | 70 (66.7)        | <0.0001 |
| Use of any antihypertensive drug, n (%) | 311 (34.4)            | 88 (83.8)        | <0.0001 |

|                                         |            |           |         |
|-----------------------------------------|------------|-----------|---------|
| Use of lipid-lowering drugs, n (%)      | 37 (3.9)   | 1 (0.9)   | 0.11    |
| Tobacco smoking, n (%)                  |            |           | 0.002   |
| Former smokers                          | 88 (9.7)   | 13 (12.4) |         |
| Current smokers                         | 173 (19.1) | 26 (24.8) |         |
| History of diabetic retinopathy         |            |           | <0.0001 |
| Absent                                  | 201 (22.1) | 1 (1)     |         |
| Non-proliferative                       | 387 (42.7) | 28 (26.6) |         |
| Proliferative                           | 319 (35.2) | 76 (72.4) |         |
| History of myocardial infarction, n (%) | 31 (3.4)   | 5 (4.8)   | 0.50    |
| History of stroke, n (%)                | 13 (1.4)   | 5 (4.8)   | 0.04    |
| Redox genetic risk score                | 6.3 ± 2.1  | 7.2 ± 2.2 | 0.0001  |

Quantitative data expressed as mean±SD, except for UAC presented as median (25<sup>th</sup>, 75<sup>th</sup> percentiles). Statistics are Chi-2, ANOVA, or Wilcoxon tests. P<0.008 was significant.

eGFR: estimated glomerular filtration rate; UAC: urinary albumin concentration; ACE: angiotensin-I-converting enzyme; ARBs: angiotensin receptor blockers.

## List of Contributors to SURGENE, GENEDIAB, and GENESIS studies

### Clinical investigators at baseline by alphabetical order of enrollment centers

All cities are in France, except for Liège, in Belgium:

Albert Fournier, Jean-Daniel Lalau (*Centre Hospitalier Universitaire d'Amiens*); Béatrice Bouhanick, Line Godiveau, Michel Marre, Vincent Rohmer (*Centre Hospitalier Universitaire d'Angers*); Jean-Raymond Attali, Patrick Miossec (*Assistance Publique des Hôpitaux de Paris, Hôpital de Bondy*); Henri Gin, Vincent Rigalleau (*Centre Hospitalier Universitaire de Bordeaux*); Isabelle Cerf, Guillaume Charpentier, Isabelle Petit, Jean-Pierre Riveline (*Centre Hospitalier de Corbeil-Essonnes*); Bertrand Godeau, Zoubida Kahal, Dominique Simon (*Assistance Publique des Hôpitaux de Paris, Hôpital de Créteil*); Daniel Cordonnier, Serge Halimi (*Centre Hospitalier Universitaire de Grenoble*); Pierre-Jean Lefebvre, Nicolas Paquot, André Scheen, Laurent Weekers (*Centre Hospitalier Universitaire de Liège*); Pierre Fontaine, Gaëtan Prevot (*Centre Hospitalier Régional Universitaire de Lille*); François Berthezene, Fabrice Bonnet, Maurice Laville, Jean-Pierre Fauvel, Charles Thivolet (*Assistance Publique des Hôpitaux de Lyon*); Bertrand Dussolle, Philippe Vague (*Assistance Publique des Hôpitaux de Marseille*); Patrick Giraud (*Clinique Pont de Chaume, Montauban*); Jacques Bringer, Florence Galtier, Michel Rodier (*Centres Hospitaliers Universitaires de Montpellier et Nîmes*); Pierre Drouin, Laurent Dusselier, Thérèse Crea, Bruno Guerci, Michèle Kessler (*Centre Hospitalier Universitaire de Nancy*); Lucy Chaillous, Bernard Charbonnel (*Centre Hospitalier Universitaire de Nantes*); Hamid Boukersi, Françoise Defrance, Etienne Larger, Michel Marre, Ronan Roussel (*Assistance Publique des Hôpitaux de Paris, Hôpital Bichat-Claude Bernard*); Gérard Slama, Agnès Sola (*Assistance Publique des Hôpitaux de Paris, Hôpital de l'Hôtel Dieu*); André Grimaldi, Agnès Heurtier, Caroline Sert (*Assistance Publique des Hôpitaux de Paris, Hôpital de La Pitié Salpêtrière*); Jean-Pierre Grunfeld (*Assistance Publique des Hôpitaux de Paris, Hôpital Necker*); Ahmed Bouallouche, Jean-François Gautier, Pierre-Jean Guillausseau, Hervé Leblanc, Philippe Passa (*Assistance Publique des Hôpitaux de Paris, Hôpitaux Saint-Louis et Lariboisière*); Samy Hadjadj, Richard Maréchaud, Anne Muller, Florence Torremocha (*Centre Hospitalier Universitaire de Poitiers*); Jacques Chanard, Jean-Paul Melin (*Centre Hospitalier Universitaire de Reims*); Hubert Allannic, Jean-Yves Poirier (*Centre Hospitalier Universitaire de Rennes*); Christian Charasse (*Centre Hospitalier de Saint-Brieuc*); Bernard Bauduceau, Lyse Bordier, Hervé Mayaudon (*Hôpital d'Instruction des Armées Bégin, Saint-Mandé*); Marie-Pierre Arpin-Bott (*Centre*

*Hospitalier Universitaire de Strasbourg*); Hélène Hanaire, Pierre Gourdy, Henri Sackmann, Jean-Pierre Tauber (*Centre Hospitalier Universitaire de Toulouse*); Odile Verier-Mine (*Centre Hospitalier de Valenciennes*).
